# Supplementary material
Source: publisher figshare collection journal article supplement (https://acs.figshare.com/ndownloader/files/5080207)
Supplement: Supplementary file 1 [file 5080207]

 
data_compound 3a
_ccdc_journal_manuscript_code    om050582z
_publ_requested_journal          Organometallics
_publ_contact_author_name        'Dra. Ver\'onica Salazar'
_publ_contact_author_address     
;Centro de Investigaciones Qu\'imicas
Universidad Aut\'onoma del Estado de Hidalgo
Ciudad Universitaria Km 4.5,
Carretera Pachuca-Tulancingo
Pachuca, Hidalgo
M\'exico
;
_publ_contact_author_email       salazar@uaeh.reduaeh.mx
_publ_contact_author_phone       '+52 (222) 2292607'
_publ_contact_author_fax         '+52 (222) 229 2419'
loop_
_publ_author_name
_publ_author_address
"M\'endez-Rojas, M. A."
;Departamento de Qu\'imica y Biolog\'ia
Universidad de las Am\'ericas, Puebla
Ex-Hacienda de Sta. Catarina Martir
Cholula 72820, Puebla
Mexico
;
'Salazar, V.'
;Centro de Investigaciones Qu\'imicas
Universidad Aut\'onoma del Estado de Hidalgo
Ciudad Universitaria Km 4.5,
Carretera Pachuca-Tulancingo
Pachuca, Hidalgo
M\'exico
;
"Su\'arez-Castillo, O. R."
;Centro de Investigaciones Qu\'imicas
Universidad Aut\'onoma del Estado de Hidalgo
Ciudad Universitaria Km 4.5
Carretera Pachuca-Tulancingo
Pachuca, Hidalgo
M\'exico
;
'Padilla, R.'
;Centro de Investigaciones Qu\'imicas
Universidad Aut\'onoma del Estado de Hidalgo
Ciudad Universitaria Km 4.5
Carretera Pachuca-Tulancingo
Pachuca, Hidalgo
M\'exico
;
"Mac\'ias P., J. C."
;Centro de Investigaciones Qu\'imicas
Universidad Aut\'onoma del Estado de Hidalgo
Ciudad Universitaria Km 4.5
Carretera Pachuca-Tulancingo
Pachuca, Hidalgo
M\'exico
;
'Tamariz, J.'
;Departamento de Qu\'imica Org\'anica
Escuela Nacional de Ciencias Biol\'ogicas
Instituto Polit\'ecnico Nacional
Prolongaci\'on Carpio y Plan de Ayala, 11340
M\'exico D.F.
;
'Benavides, A.'
;Departamento de Qu\'imica Org\'anica
Escuela Nacional de Ciencias Biol\'ogicas
Instituto Polit\'ecnico Nacional
Prolongaci\'on Carpio y Plan de Ayala, 11340
M\'exico D.F.
;

_audit_creation_method           SHELXL-97
_chemical_name_systematic        
;
 ?
;
_chemical_name_common            ?
_chemical_melting_point          ?
_chemical_formula_moiety         'C32 H36 B Cl Ir N7 O, C H2 Cl2'
_chemical_formula_sum            'C33 H38 B Cl3 Ir N7 O'
_chemical_formula_weight         858.06

loop_
_atom_type_symbol
_atom_type_description
_atom_type_scat_dispersion_real
_atom_type_scat_dispersion_imag
_atom_type_scat_source
C C 0.0033 0.0016 'International Tables Vol C Tables 4.2.6.8 and 6.1.1.4'
B B 0.0013 0.0007 'International Tables Vol C Tables 4.2.6.8 and 6.1.1.4'
H H 0.0000 0.0000 'International Tables Vol C Tables 4.2.6.8 and 6.1.1.4'
Cl Cl 0.1484 0.1585 'International Tables Vol C Tables 4.2.6.8 and 6.1.1.4'
Ir Ir -1.4442 7.9887 'International Tables Vol C Tables 4.2.6.8 and 6.1.1.4'
N N 0.0061 0.0033 'International Tables Vol C Tables 4.2.6.8 and 6.1.1.4'
O O 0.0106 0.0060 'International Tables Vol C Tables 4.2.6.8 and 6.1.1.4'

_symmetry_cell_setting           Monoclinic
_symmetry_space_group_name_h-m    P2(1)/n
_symmetry_space_group_name_Hall   '-P 2yn'

loop_
_symmetry_equiv_pos_as_xyz
'x, y, z'
'-x+1/2, y+1/2, -z+1/2'
'-x, -y, -z'
'x-1/2, -y-1/2, z-1/2'

_cell_length_a                   11.3259(12)
_cell_length_b                   21.219(2)
_cell_length_c                   15.0905(16)
_cell_angle_alpha                90.00
_cell_angle_beta                 100.147(2)
_cell_angle_gamma                90.00
_cell_volume                     3569.9(7)
_cell_formula_units_Z            4
_cell_measurement_temperature    293(2)
_cell_measurement_reflns_used    ?
_cell_measurement_theta_min      ?
_cell_measurement_theta_max      ?
_exptl_crystal_description        prism
_exptl_crystal_colour             red
_exptl_crystal_size_max           0.19
_exptl_crystal_size_mid           0.16
_exptl_crystal_size_min           0.07
_exptl_crystal_density_meas      ?
_exptl_crystal_density_diffrn    1.597
_exptl_crystal_density_method    'not measured'
_exptl_crystal_F_000             1704
_exptl_absorpt_coefficient_mu    4.002
_exptl_absorpt_correction_type    multi-scan
_exptl_absorpt_correction_t_min   0.48
_exptl_absorpt_correction_t_max   0.79
_exptl_absorpt_process_details   
;
 SADABS: Area-Detector Absorption Correction. Bruker-AXS
 within v. 7.06 a (Bruker AXS, 2003).
;
_exptl_special_details           
;
 ?
;

_diffrn_ambient_temperature      293(2)
_diffrn_radiation_wavelength     0.71073
_diffrn_radiation_type           MoK\a
_diffrn_radiation_source         'fine-focus sealed tube'
_diffrn_radiation_monochromator  graphite
_diffrn_measurement_device_type   'Bruker-Nonius SMART 5000 CCD' 
_diffrn_measurement_method        'omega scans with narrow frames' 
_diffrn_detector_area_resol_mean   8.26
_diffrn_standards_number          'no decay'
_diffrn_standards_interval_count ?
_diffrn_standards_interval_time  ?
_diffrn_standards_decay_%        ?
_diffrn_reflns_number            10625
_diffrn_reflns_av_R_equivalents  0.0894
_diffrn_reflns_av_sigmaI/netI    0.0784
_diffrn_reflns_limit_h_min       -10
_diffrn_reflns_limit_h_max       10
_diffrn_reflns_limit_k_min       -16
_diffrn_reflns_limit_k_max       19
_diffrn_reflns_limit_l_min       -13
_diffrn_reflns_limit_l_max       13
_diffrn_reflns_theta_min         1.67
_diffrn_reflns_theta_max         18.68
_reflns_number_total             2741
_reflns_number_gt                1912
_reflns_threshold_expression     >2sigma(I)

_computing_data_collection        'APEX-W2K-NT v. 1.0 (Bruker AXS, 2004)'
_computing_cell_refinement        'SAINT+ v. 7.06 a (Bruker AXS, 2003)'
_computing_data_reduction         'SAINT+ v. 7.06 a (Bruker AXS, 2001)'
_computing_structure_solution     'SHELXS-97 (Sheldrick, 1990)'
_computing_structure_refinement   'SHELXL-97 (Sheldrick, 1997)'
_computing_molecular_graphics     'XP, SHELXTL v. 6.10 (Bruker, 2000)'
_computing_publication_material   'XCIF, SHELXTL v. 6.12 (Bruker, 2001)'

_refine_special_details          
;
 Refinement of F^2^ against ALL reflections.  The weighted R-factor wR and
 goodness of fit S are based on F^2^, conventional R-factors R are based
 on F, with F set to zero for negative F^2^. The threshold expression of
 F^2^ > 2sigma(F^2^) is used only for calculating R-factors(gt) etc. and is
 not relevant to the choice of reflections for refinement.  R-factors based
 on F^2^ are statistically about twice as large as those based on F, and R-
 factors based on ALL data will be even larger.
;

_refine_ls_structure_factor_coef Fsqd
_refine_ls_matrix_type           full
_refine_ls_weighting_scheme      calc
_refine_ls_weighting_details     
'calc w=1/[\s^2^(Fo^2^)+(0.0436P)^2^+0.0000P] where P=(Fo^2^+2Fc^2^)/3'
_atom_sites_solution_primary     direct
_atom_sites_solution_secondary   difmap
_atom_sites_solution_hydrogens   geom
_refine_ls_hydrogen_treatment    mixed
_refine_ls_extinction_method     SHELXL
_refine_ls_extinction_coef       0.00000(6)
_refine_ls_extinction_expression Fc^*^=kFc[1+0.001xFc^2^\l^3^/sin(2\q)]^-1/4^
_refine_ls_number_reflns         2741
_refine_ls_number_parameters     428
_refine_ls_number_restraints     0
_refine_ls_R_factor_all          0.0694
_refine_ls_R_factor_gt           0.0414
_refine_ls_wR_factor_ref         0.0917
_refine_ls_wR_factor_gt          0.0840
_refine_ls_goodness_of_fit_ref   0.944
_refine_ls_restrained_S_all      0.944
_refine_ls_shift/su_max          7.148
_refine_ls_shift/su_mean         0.028

loop_
_atom_site_label
_atom_site_type_symbol
_atom_site_fract_x
_atom_site_fract_y
_atom_site_fract_z
_atom_site_U_iso_or_equiv
_atom_site_adp_type
_atom_site_occupancy
_atom_site_symmetry_multiplicity
_atom_site_calc_flag
_atom_site_refinement_flags
_atom_site_disorder_assembly
_atom_site_disorder_group
B1 B 0.0318(18) 0.0971(10) 0.8338(11) 0.062(6) Uani 1 1 d . . .
H1 H -0.001(12) 0.057(6) 0.809(8) 0.074 Uiso 1 1 calc . . .
C1 C 0.2057(16) 0.0286(9) 0.9217(10) 0.063(5) Uani 1 1 d . . .
C2 C 0.3152(15) 0.0433(9) 0.9701(10) 0.067(5) Uani 1 1 d . . .
H2 H 0.3746 0.0148 0.9945 0.081 Uiso 1 1 calc R . .
C3 C 0.3221(16) 0.1094(9) 0.9764(10) 0.061(5) Uani 1 1 d . . .
C4 C 0.1553(14) -0.0340(8) 0.8947(10) 0.085(5) Uani 1 1 d . . .
H4A H 0.2161 -0.0655 0.9105 0.127 Uiso 1 1 calc R . .
H4B H 0.1274 -0.0346 0.8308 0.127 Uiso 1 1 calc R . .
H4C H 0.0894 -0.0425 0.9252 0.127 Uiso 1 1 calc R . .
C5 C 0.4274(12) 0.1443(7) 1.0234(9) 0.064(5) Uani 1 1 d . . .
H5A H 0.4088 0.1884 1.0241 0.095 Uiso 1 1 calc R . .
H5B H 0.4938 0.1380 0.9926 0.095 Uiso 1 1 calc R . .
H5C H 0.4483 0.1291 1.0841 0.095 Uiso 1 1 calc R . .
C6 C 0.0275(13) 0.1293(8) 0.6685(13) 0.057(5) Uani 1 1 d . . .
C7 C 0.0608(14) 0.1820(9) 0.6269(9) 0.056(5) Uani 1 1 d . . .
H7 H 0.0489 0.1893 0.5652 0.067 Uiso 1 1 calc R . .
C8 C 0.1141(12) 0.2216(7) 0.6923(12) 0.048(4) Uani 1 1 d . . .
C9 C -0.0307(15) 0.0719(8) 0.6256(9) 0.083(5) Uani 1 1 d . . .
H9A H 0.0083 0.0353 0.6545 0.124 Uiso 1 1 calc R . .
H9B H -0.0244 0.0716 0.5629 0.124 Uiso 1 1 calc R . .
H9C H -0.1137 0.0717 0.6314 0.124 Uiso 1 1 calc R . .
C10 C 0.1682(13) 0.2858(8) 0.6843(8) 0.073(5) Uani 1 1 d . . .
H10A H 0.1352 0.3151 0.7217 0.110 Uiso 1 1 calc R . .
H10B H 0.1503 0.2996 0.6228 0.110 Uiso 1 1 calc R . .
H10C H 0.2536 0.2835 0.7032 0.110 Uiso 1 1 calc R . .
C11 C -0.1765(16) 0.1169(8) 0.8867(9) 0.057(4) Uani 1 1 d . . .
C12 C -0.2175(14) 0.1695(9) 0.9263(10) 0.060(4) Uani 1 1 d . . .
H12 H -0.2944 0.1747 0.9388 0.072 Uiso 1 1 calc R . .
C13 C -0.1264(17) 0.2126(8) 0.9439(9) 0.055(4) Uani 1 1 d . . .
C14 C -0.2327(13) 0.0564(7) 0.8521(10) 0.086(5) Uani 1 1 d . . .
H14A H -0.2205 0.0500 0.7914 0.129 Uiso 1 1 calc R . .
H14B H -0.3171 0.0578 0.8533 0.129 Uiso 1 1 calc R . .
H14C H -0.1968 0.0224 0.8893 0.129 Uiso 1 1 calc R . .
C15 C -0.1302(12) 0.2750(7) 0.9863(9) 0.071(4) Uani 1 1 d . . .
H15A H -0.0919 0.2726 1.0482 0.106 Uiso 1 1 calc R . .
H15B H -0.2121 0.2878 0.9829 0.106 Uiso 1 1 calc R . .
H15C H -0.0890 0.3051 0.9553 0.106 Uiso 1 1 calc R . .
C16 C 0.2563(17) 0.1208(8) 1.2461(9) 0.059(5) Uani 1 1 d . . .
C17 C 0.1532(14) 0.1134(7) 1.1866(11) 0.052(4) Uani 1 1 d . . .
H17 H 0.1025 0.0798 1.1927 0.063 Uiso 1 1 calc R . .
C18 C 0.1227(13) 0.1562(8) 1.1161(9) 0.051(4) Uani 1 1 d . . .
H18 H 0.0523 0.1513 1.0745 0.061 Uiso 1 1 calc R . .
C19 C 0.1998(15) 0.2064(8) 1.1094(10) 0.053(5) Uani 1 1 d . . .
C20 C 0.3050(15) 0.2120(8) 1.1698(11) 0.061(5) Uani 1 1 d . . .
H20 H 0.3581 0.2443 1.1629 0.073 Uiso 1 1 calc R . .
C21 C 0.3330(13) 0.1706(9) 1.2402(10) 0.061(5) Uani 1 1 d . . .
H21 H 0.4021 0.1759 1.2830 0.074 Uiso 1 1 calc R . .
C22 C 0.1634(12) 0.3125(9) 1.0663(10) 0.052(4) Uani 1 1 d . . .
C23 C 0.1582(14) 0.3272(7) 1.1669(9) 0.085(5) Uani 1 1 d . . .
H23A H 0.1401 0.2892 1.1965 0.127 Uiso 1 1 calc R . .
H23B H 0.0969 0.3580 1.1699 0.127 Uiso 1 1 calc R . .
H23C H 0.2343 0.3433 1.1961 0.127 Uiso 1 1 calc R . .
C24 C 0.1512(12) 0.3659(8) 1.0051(11) 0.057(5) Uani 1 1 d . . .
C25 C 0.1253(15) 0.4233(8) 1.0313(10) 0.089(6) Uani 1 1 d . . .
H25A H 0.1144 0.4301 1.0903 0.106 Uiso 1 1 calc R . .
H25B H 0.1180 0.4567 0.9908 0.106 Uiso 1 1 calc R . .
C26 C 0.1575(16) 0.3502(10) 0.9068(11) 0.070(11) Uani 1.00(6) 1 d . . .
H26 H 0.1357 0.3888 0.8722 0.084 Uiso 1.0(3) 1 calc R . .
C27 C 0.2846(14) 0.3338(10) 0.8946(9) 0.056(4) Uani 1 1 d . . .
C28 C 0.3028(14) 0.2695(9) 0.8877(8) 0.049(4) Uani 1 1 d . . .
C29 C 0.4063(16) 0.2481(8) 0.8637(9) 0.065(5) Uani 1 1 d . . .
H29 H 0.4172 0.2053 0.8544 0.078 Uiso 1 1 calc R . .
C30 C 0.4970(15) 0.2921(11) 0.8532(10) 0.078(6) Uani 1 1 d . . .
H30 H 0.5699 0.2777 0.8408 0.094 Uiso 1 1 calc R . .
C31 C 0.4788(19) 0.3555(11) 0.8613(11) 0.086(6) Uani 1 1 d . . .
H31 H 0.5384 0.3836 0.8520 0.104 Uiso 1 1 calc R . .
C32 C 0.3733(19) 0.3782(8) 0.8829(9) 0.066(5) Uani 1 1 d . . .
H32 H 0.3610 0.4211 0.8894 0.079 Uiso 1 1 calc R . .
Cl1 Cl 0.2883(4) 0.0648(2) 1.3329(2) 0.0813(14) Uani 1 1 d . . .
Ir1 Ir 0.14926(5) 0.22369(3) 0.90684(4) 0.0487(3) Uani 1 1 d . . .
N1 N 0.1499(11) 0.0844(7) 0.9002(7) 0.042(3) Uani 1 1 d . . .
N2 N 0.2176(12) 0.1363(6) 0.9319(7) 0.059(4) Uani 1 1 d . . .
N3 N 0.0579(10) 0.1387(6) 0.7570(8) 0.048(3) Uani 1 1 d . . .
N4 N 0.1130(9) 0.1956(7) 0.7761(9) 0.052(4) Uani 1 1 d . . .
N5 N -0.0610(12) 0.1288(7) 0.8806(7) 0.056(3) Uani 1 1 d . . .
N6 N -0.0290(10) 0.1882(7) 0.9171(8) 0.051(3) Uani 1 1 d . . .
N7 N 0.1722(10) 0.2540(7) 1.0387(8) 0.052(4) Uani 1 1 d . . .
O1 O 0.0770(9) 0.3060(5) 0.8717(6) 0.063(3) Uani 1 1 d . . .
Cl3 Cl 0.1906(10) 0.5734(5) 0.8948(9) 0.318(7) Uani 1 1 d . . .
Cl4 Cl 0.0614(11) 0.5122(8) 0.7414(8) 0.397(9) Uani 1 1 d . . .
C33 C 0.166(3) 0.570(3) 0.778(3) 0.56(6) Uani 1 1 d . . .
H33A H 0.1382 0.6101 0.7523 0.669 Uiso 1 1 calc R . .
H33B H 0.2410 0.5597 0.7574 0.669 Uiso 1 1 calc R . .

loop_
_atom_site_aniso_label
_atom_site_aniso_U_11
_atom_site_aniso_U_22
_atom_site_aniso_U_33
_atom_site_aniso_U_23
_atom_site_aniso_U_13
_atom_site_aniso_U_12
B1 0.059(15) 0.107(19) 0.022(11) -0.008(12) 0.014(12) 0.006(14)
C1 0.045(13) 0.073(15) 0.059(11) -0.007(11) -0.022(10) -0.007(12)
C2 0.052(14) 0.083(17) 0.062(11) 0.012(10) -0.004(10) 0.008(11)
C3 0.054(15) 0.080(16) 0.049(11) -0.029(10) 0.011(11) -0.025(12)
C4 0.063(11) 0.090(14) 0.092(13) 0.014(11) -0.013(10) 0.017(12)
C5 0.039(10) 0.086(13) 0.068(11) 0.018(10) 0.015(9) 0.005(10)
C6 0.043(11) 0.055(13) 0.074(16) -0.006(13) 0.009(10) 0.001(10)
C7 0.062(12) 0.070(13) 0.028(10) -0.029(11) -0.013(9) 0.006(10)
C8 0.050(10) 0.037(11) 0.059(12) 0.020(12) 0.016(9) 0.011(10)
C9 0.099(14) 0.099(15) 0.047(10) -0.015(10) 0.003(10) 0.014(12)
C10 0.060(11) 0.123(17) 0.035(9) 0.030(10) 0.003(8) 0.007(11)
C11 0.040(13) 0.070(14) 0.056(11) 0.006(10) -0.004(9) -0.031(12)
C12 0.043(12) 0.066(13) 0.069(11) 0.005(10) 0.002(9) 0.008(12)
C13 0.044(12) 0.073(14) 0.044(9) 0.001(9) -0.001(9) -0.019(13)
C14 0.066(12) 0.095(14) 0.100(13) -0.022(11) 0.023(10) -0.038(12)
C15 0.051(10) 0.078(12) 0.088(11) -0.026(11) 0.024(9) -0.016(11)
C16 0.049(12) 0.090(14) 0.027(10) -0.010(9) -0.022(10) 0.016(11)
C17 0.052(13) 0.058(11) 0.048(10) 0.000(10) 0.011(10) -0.002(9)
C18 0.032(10) 0.075(12) 0.044(11) -0.001(10) 0.002(8) -0.014(11)
C19 0.030(10) 0.092(16) 0.032(10) 0.002(10) -0.009(10) -0.002(11)
C20 0.063(14) 0.082(14) 0.036(9) 0.011(10) 0.003(10) -0.019(10)
C21 0.038(11) 0.084(14) 0.057(13) -0.017(12) -0.005(9) -0.019(12)
C22 0.035(10) 0.060(13) 0.060(12) 0.019(12) 0.006(8) -0.008(10)
C23 0.113(15) 0.090(14) 0.049(11) -0.012(10) 0.009(10) -0.017(12)
C24 0.040(10) 0.041(12) 0.081(14) -0.004(12) -0.017(9) -0.017(9)
C25 0.135(17) 0.066(14) 0.068(12) -0.014(10) 0.026(11) -0.001(12)
C26 0.060(16) 0.13(2) 0.027(12) -0.010(12) 0.022(9) 0.014(14)
C27 0.037(12) 0.076(14) 0.052(10) 0.009(9) 0.000(8) -0.004(12)
C28 0.043(12) 0.063(14) 0.041(8) 0.020(9) 0.003(8) -0.020(10)
C29 0.036(10) 0.110(17) 0.051(10) 0.009(9) 0.016(8) -0.003(12)
C30 0.037(13) 0.140(19) 0.060(11) 0.043(13) 0.015(9) 0.008(14)
C31 0.081(18) 0.104(19) 0.077(12) 0.019(13) 0.022(11) -0.012(15)
C32 0.080(14) 0.062(13) 0.053(10) 0.006(9) 0.003(10) -0.011(13)
Cl1 0.084(3) 0.090(3) 0.062(3) 0.018(2) -0.009(2) 0.004(3)
Ir1 0.0341(4) 0.0695(5) 0.0396(4) 0.0003(4) -0.0020(3) -0.0024(5)
N1 0.027(8) 0.053(9) 0.044(7) -0.002(8) 0.001(6) -0.001(9)
N2 0.019(8) 0.120(13) 0.035(7) 0.000(8) -0.006(6) -0.038(9)
N3 0.047(8) 0.083(11) 0.012(8) -0.003(8) -0.005(6) 0.004(8)
N4 0.018(7) 0.047(9) 0.089(12) -0.018(9) 0.007(7) -0.008(6)
N5 0.044(11) 0.072(11) 0.047(8) 0.002(7) -0.004(7) -0.026(9)
N6 0.011(8) 0.088(11) 0.051(8) 0.014(7) 0.002(6) -0.012(8)
N7 0.023(7) 0.060(10) 0.070(10) 0.005(9) 0.002(7) 0.000(7)
O1 0.039(7) 0.098(9) 0.046(6) -0.002(6) -0.011(5) -0.035(6)
Cl3 0.281(14) 0.269(11) 0.459(18) -0.028(12) 0.217(15) -0.065(9)
Cl4 0.190(11) 0.68(3) 0.335(16) 0.174(17) 0.085(11) -0.007(14)
C33 0.18(4) 1.20(18) 0.33(6) 0.03(7) 0.15(4) -0.27(7)

_geom_special_details            
;
 All esds (except the esd in the dihedral angle between two l.s. planes)
 are estimated using the full covariance matrix.  The cell esds are taken
 into account individually in the estimation of esds in distances, angles
 and torsion angles; correlations between esds in cell parameters are only
 used when they are defined by crystal symmetry.  An approximate (isotropic)
 treatment of cell esds is used for estimating esds involving l.s. planes.
;

loop_
_geom_bond_atom_site_label_1
_geom_bond_atom_site_label_2
_geom_bond_distance
_geom_bond_site_symmetry_2
_geom_bond_publ_flag
B1 N5 1.52(2) . ?
B1 N3 1.53(2) . ?
B1 N1 1.55(2) . ?
C1 N1 1.354(18) . ?
C1 C2 1.360(18) . ?
C1 C4 1.474(19) . ?
C2 C3 1.409(19) . ?
C3 N2 1.377(19) . ?
C3 C5 1.474(18) . ?
C6 N3 1.335(17) . ?
C6 C7 1.367(18) . ?
C6 C9 1.478(19) . ?
C7 C8 1.354(18) . ?
C8 N4 1.382(15) . ?
C8 C10 1.508(18) . ?
C11 N5 1.352(17) . ?
C11 C12 1.385(18) . ?
C11 C14 1.485(18) . ?
C12 C13 1.369(18) . ?
C13 N6 1.344(16) . ?
C13 C15 1.474(17) . ?
C16 C17 1.352(18) . ?
C16 C21 1.380(18) . ?
C16 Cl1 1.759(15) . ?
C17 C18 1.395(16) . ?
C18 C19 1.393(17) . ?
C19 C20 1.371(18) . ?
C19 N7 1.462(17) . ?
C20 C21 1.373(17) . ?
C22 N7 1.319(16) . ?
C22 C24 1.454(19) . ?
C22 C23 1.561(18) . ?
C24 C25 1.330(18) . ?
C24 C26 1.53(2) . ?
C26 O1 1.350(17) . ?
C26 C27 1.52(2) . ?
C27 C28 1.39(2) . ?
C27 C32 1.411(19) . ?
C28 C29 1.364(18) . ?
C28 Ir1 2.057(13) . ?
C29 C30 1.42(2) . ?
C30 C31 1.37(2) . ?
C31 C32 1.38(2) . ?
Ir1 O1 1.962(10) . ?
Ir1 N2 2.018(14) . ?
Ir1 N4 2.032(13) . ?
Ir1 N7 2.064(13) . ?
Ir1 N6 2.185(11) . ?
N1 N2 1.379(14) . ?
N3 N4 1.368(13) . ?
N5 N6 1.399(14) . ?
Cl3 C33 1.74(4) . ?
Cl4 C33 1.72(5) . ?

loop_
_geom_angle_atom_site_label_1
_geom_angle_atom_site_label_2
_geom_angle_atom_site_label_3
_geom_angle
_geom_angle_site_symmetry_1
_geom_angle_site_symmetry_3
_geom_angle_publ_flag
N5 B1 N3 109.9(14) . . ?
N5 B1 N1 111.4(11) . . ?
N3 B1 N1 109.3(14) . . ?
N1 C1 C2 105.8(15) . . ?
N1 C1 C4 125.4(15) . . ?
C2 C1 C4 128.8(19) . . ?
C1 C2 C3 107.4(15) . . ?
N2 C3 C2 110.3(13) . . ?
N2 C3 C5 125.4(17) . . ?
C2 C3 C5 124.3(19) . . ?
N3 C6 C7 107.2(14) . . ?
N3 C6 C9 125.3(17) . . ?
C7 C6 C9 127.5(17) . . ?
C8 C7 C6 107.2(14) . . ?
C7 C8 N4 110.2(14) . . ?
C7 C8 C10 129.6(17) . . ?
N4 C8 C10 120.2(15) . . ?
N5 C11 C12 106.3(13) . . ?
N5 C11 C14 119.9(17) . . ?
C12 C11 C14 133.9(17) . . ?
C13 C12 C11 108.9(14) . . ?
N6 C13 C12 108.4(14) . . ?
N6 C13 C15 124.3(16) . . ?
C12 C13 C15 127.3(17) . . ?
C17 C16 C21 121.7(14) . . ?
C17 C16 Cl1 117.2(16) . . ?
C21 C16 Cl1 121.1(14) . . ?
C16 C17 C18 120.0(14) . . ?
C19 C18 C17 118.6(13) . . ?
C20 C19 C18 120.0(14) . . ?
C20 C19 N7 118.3(15) . . ?
C18 C19 N7 121.6(14) . . ?
C19 C20 C21 120.9(15) . . ?
C20 C21 C16 118.6(14) . . ?
N7 C22 C24 122.5(15) . . ?
N7 C22 C23 120.8(14) . . ?
C24 C22 C23 116.5(16) . . ?
C25 C24 C22 121.8(16) . . ?
C25 C24 C26 122.5(16) . . ?
C22 C24 C26 115.4(15) . . ?
O1 C26 C27 112.4(14) . . ?
O1 C26 C24 112.8(14) . . ?
C27 C26 C24 111.9(14) . . ?
C28 C27 C32 121.9(14) . . ?
C28 C27 C26 113.0(17) . . ?
C32 C27 C26 125(2) . . ?
C29 C28 C27 119.6(13) . . ?
C29 C28 Ir1 131.8(15) . . ?
C27 C28 Ir1 108.3(13) . . ?
C28 C29 C30 118.9(15) . . ?
C31 C30 C29 120.9(17) . . ?
C30 C31 C32 120.9(19) . . ?
C31 C32 C27 117.5(16) . . ?
O1 Ir1 N2 174.9(4) . . ?
O1 Ir1 N4 89.7(5) . . ?
N2 Ir1 N4 85.3(5) . . ?
O1 Ir1 C28 82.2(6) . . ?
N2 Ir1 C28 98.9(7) . . ?
N4 Ir1 C28 91.9(5) . . ?
O1 Ir1 N7 87.7(5) . . ?
N2 Ir1 N7 97.3(5) . . ?
N4 Ir1 N7 175.5(4) . . ?
C28 Ir1 N7 91.3(5) . . ?
O1 Ir1 N6 88.8(5) . . ?
N2 Ir1 N6 90.0(5) . . ?
N4 Ir1 N6 86.4(5) . . ?
C28 Ir1 N6 170.8(6) . . ?
N7 Ir1 N6 90.0(5) . . ?
C1 N1 N2 114.1(12) . . ?
C1 N1 B1 128.4(14) . . ?
N2 N1 B1 116.8(14) . . ?
C3 N2 N1 102.4(13) . . ?
C3 N2 Ir1 137.8(12) . . ?
N1 N2 Ir1 119.8(11) . . ?
C6 N3 N4 111.7(12) . . ?
C6 N3 B1 128.6(16) . . ?
N4 N3 B1 119.6(13) . . ?
N3 N4 C8 103.7(12) . . ?
N3 N4 Ir1 118.0(11) . . ?
C8 N4 Ir1 137.7(13) . . ?
C11 N5 N6 109.2(12) . . ?
C11 N5 B1 134.8(16) . . ?
N6 N5 B1 115.4(14) . . ?
C13 N6 N5 107.2(12) . . ?
C13 N6 Ir1 135.0(13) . . ?
N5 N6 Ir1 117.4(11) . . ?
C22 N7 C19 116.0(12) . . ?
C22 N7 Ir1 126.4(11) . . ?
C19 N7 Ir1 117.6(10) . . ?
C26 O1 Ir1 106.9(11) . . ?
Cl4 C33 Cl3 109(2) . . ?

_diffrn_measured_fraction_theta_max 0.996
_diffrn_reflns_theta_full        18.68
_diffrn_measured_fraction_theta_full 0.996
_refine_diff_density_max         0.879
_refine_diff_density_min         -0.892
_refine_diff_density_rms         0.106

--------------------------------------------------------------------------------------------
--------------------------------------------------------------------------------------------

data_compound 3b
_ccdc_journal_manuscript_code    om050582z
_publ_requested_journal          Organometallics
_publ_contact_author_name        'Dra. Ver\'onica Salazar'
_publ_contact_author_address     
;Centro de Investigaciones Qu\'imicas
Universidad Aut\'onoma del Estado de Hidalgo
Ciudad Universitaria Km 4.5,
Carretera Pachuca-Tulancingo
Pachuca, Hidalgo
M\'exico
;
_publ_contact_author_email       salazar@uaeh.reduaeh.mx
_publ_contact_author_phone       '+52 (222) 2292607'
_publ_contact_author_fax         '+52 (222) 229 2419'
loop_
_publ_author_name
_publ_author_address
"M\'endez-Rojas, M. A."
;Departamento de Qu\'imica y Biolog\'ia
Universidad de las Am\'ericas, Puebla
Ex-Hacienda de Sta. Catarina Martir
Cholula 72820, Puebla
Mexico
;
'Salazar, V.'
;Centro de Investigaciones Qu\'imicas
Universidad Aut\'onoma del Estado de Hidalgo
Ciudad Universitaria Km 4.5,
Carretera Pachuca-Tulancingo
Pachuca, Hidalgo
M\'exico
;
"Su\'arez-Castillo, O. R."
;Centro de Investigaciones Qu\'imicas
Universidad Aut\'onoma del Estado de Hidalgo
Ciudad Universitaria Km 4.5
Carretera Pachuca-Tulancingo
Pachuca, Hidalgo
M\'exico
;
'Padilla, R.'
;Centro de Investigaciones Qu\'imicas
Universidad Aut\'onoma del Estado de Hidalgo
Ciudad Universitaria Km 4.5
Carretera Pachuca-Tulancingo
Pachuca, Hidalgo
M\'exico
;
"Mac\'ias P., J. C."
;Centro de Investigaciones Qu\'imicas
Universidad Aut\'onoma del Estado de Hidalgo
Ciudad Universitaria Km 4.5
Carretera Pachuca-Tulancingo
Pachuca, Hidalgo
M\'exico
;
'Tamariz, J.'
;Departamento de Qu\'imica Org\'anica
Escuela Nacional de Ciencias Biol\'ogicas
Instituto Polit\'ecnico Nacional
Prolongaci\'on Carpio y Plan de Ayala, 11340
M\'exico D.F.
;
'Benavides, A.'
;Departamento de Qu\'imica Org\'anica
Escuela Nacional de Ciencias Biol\'ogicas
Instituto Polit\'ecnico Nacional
Prolongaci\'on Carpio y Plan de Ayala, 11340
M\'exico D.F.
;
 
_audit_creation_method            SHELXL-97
_chemical_name_systematic
;
 ?
;
_chemical_name_common             ?
_chemical_melting_point           ?
_chemical_formula_moiety          'C33 H39 B Ir N7 O2' 
_chemical_formula_sum             'C35 H45 B Ir N7 O3'
_chemical_formula_weight          814.79
 
loop_
 _atom_type_symbol
 _atom_type_description
 _atom_type_scat_dispersion_real
 _atom_type_scat_dispersion_imag
 _atom_type_scat_source
 'C'  'C'   0.0033   0.0016
 'International Tables Vol C Tables 4.2.6.8 and 6.1.1.4'
 'H'  'H'   0.0000   0.0000
 'International Tables Vol C Tables 4.2.6.8 and 6.1.1.4'
 'B'  'B'   0.0013   0.0007
 'International Tables Vol C Tables 4.2.6.8 and 6.1.1.4'
 'Ir'  'Ir'  -1.4442   7.9887
 'International Tables Vol C Tables 4.2.6.8 and 6.1.1.4'
 'N'  'N'   0.0061   0.0033
 'International Tables Vol C Tables 4.2.6.8 and 6.1.1.4'
 'O'  'O'   0.0106   0.0060
 'International Tables Vol C Tables 4.2.6.8 and 6.1.1.4'
 
_symmetry_cell_setting            Monoclinic
_symmetry_space_group_name_h-m    P2(1)/n
_symmetry_space_group_name_H-M    '-P 2yn'
 
loop_
 _symmetry_equiv_pos_as_xyz
 'x, y, z'
 '-x+1/2, y+1/2, -z+1/2'
 '-x, -y, -z'
 'x-1/2, -y-1/2, z-1/2'
 
_cell_length_a                    9.707(7)
_cell_length_b                    26.84(3)
_cell_length_c                    14.283(7)
_cell_angle_alpha                 90.00
_cell_angle_beta                  107.93(2)
_cell_angle_gamma                 90.00
_cell_volume                      3540(5)
_cell_formula_units_Z             4
_cell_measurement_temperature     293(2)
_cell_measurement_reflns_used     ?
_cell_measurement_theta_min       ?
_cell_measurement_theta_max       ?
 
_exptl_crystal_description        prism
_exptl_crystal_colour             red
_exptl_crystal_size_max           0.57
_exptl_crystal_size_mid           0.40
_exptl_crystal_size_min           0.32
_exptl_crystal_density_meas       ?
_exptl_crystal_density_diffrn     1.529
_exptl_crystal_density_method     'not measured'
_exptl_crystal_F_000              1640
_exptl_absorpt_coefficient_mu     3.816
_exptl_absorpt_correction_type    multi-scan
_exptl_absorpt_correction_T_min   ?
_exptl_absorpt_correction_T_max   ?
_exptl_absorpt_process_details    ?
;
 SADABS: Area-Detector Absorption Correction. Bruker-AXS
 within v. 7.06 a (Bruker AXS, 2003).
;
_exptl_special_details           
;
 ?
;
 
_diffrn_ambient_temperature       293(2)
_diffrn_radiation_wavelength      0.71073
_diffrn_radiation_type            MoK\a
_diffrn_radiation_source          'fine-focus sealed tube'
_diffrn_radiation_monochromator   graphite
_diffrn_measurement_device_type   'Bruker-Nonius SMART 5000 CCD'
_diffrn_measurement_method        'omega scans with narrow frames'
_diffrn_detector_area_resol_mean  8.26
_diffrn_standards_number          'no decay'
_diffrn_standards_interval_count  ?
_diffrn_standards_interval_time   ?
_diffrn_standards_decay_%         ?
_diffrn_reflns_number             23256
_diffrn_reflns_av_R_equivalents   0.0546
_diffrn_reflns_av_sigmaI/netI     0.0482
_diffrn_reflns_limit_h_min        -8
_diffrn_reflns_limit_h_max        11
_diffrn_reflns_limit_k_min        -33
_diffrn_reflns_limit_k_max        33
_diffrn_reflns_limit_l_min        -17
_diffrn_reflns_limit_l_max        14
_diffrn_reflns_theta_min          1.52
_diffrn_reflns_theta_max          26.02
_reflns_number_total              6940
_reflns_number_gt                 5471
_reflns_threshold_expression      >2sigma(I)
 
_computing_data_collection        'APEX-W2K-NT v. 1.0 (Bruker AXS, 2004)'
_computing_cell_refinement        'SAINT+ v. 7.06 a (Bruker AXS, 2003)'
_computing_data_reduction         'SAINT+ v. 7.06 a (Bruker AXS, 2001)'
_computing_structure_solution     'SHELXS-97 (Sheldrick, 1990)'
_computing_structure_refinement   'SHELXL-97 (Sheldrick, 1997)'
_computing_molecular_graphics     'XP, SXGRAPH v. 6.10 (WinGX)'
_computing_publication_material   'XCIF, SHELXTL v. 6.10 (WinGX)'
 
_refine_special_details
;
 Refinement of F^2^ against ALL reflections.  The weighted R-factor wR and
 goodness of fit S are based on F^2^, conventional R-factors R are based
 on F, with F set to zero for negative F^2^. The threshold expression of
 F^2^ > 2sigma(F^2^) is used only for calculating R-factors(gt) etc. and is
 not relevant to the choice of reflections for refinement.  R-factors based
 on F^2^ are statistically about twice as large as those based on F, and R-
 factors based on ALL data will be even larger.
;
 
_refine_ls_structure_factor_coef  Fsqd
_refine_ls_matrix_type            full
_refine_ls_weighting_scheme       calc
_refine_ls_weighting_details
 'calc w=1/[\s^2^(Fo^2^)+(0.0484P)^2^+0.0000P] where P=(Fo^2^+2Fc^2^)/3'
_atom_sites_solution_primary      direct
_atom_sites_solution_secondary    difmap
_atom_sites_solution_hydrogens    geom
_refine_ls_hydrogen_treatment     mixed
_refine_ls_extinction_method      SHELXL
_refine_ls_extinction_coef        0.00085(10)
_refine_ls_extinction_expression
 'Fc^*^=kFc[1+0.001xFc^2^\l^3^/sin(2\q)]^-1/4^'
_refine_ls_number_reflns          6940
_refine_ls_number_parameters      429
_refine_ls_number_restraints      0
_refine_ls_R_factor_all           0.0509
_refine_ls_R_factor_gt            0.0347
_refine_ls_wR_factor_ref          0.0835
_refine_ls_wR_factor_gt           0.0782
_refine_ls_goodness_of_fit_ref    1.015
_refine_ls_restrained_S_all       1.015
_refine_ls_shift/su_max           0.001
_refine_ls_shift/su_mean          0.000
 
loop_
 _atom_site_label
 _atom_site_type_symbol
 _atom_site_fract_x
 _atom_site_fract_y
 _atom_site_fract_z
 _atom_site_U_iso_or_equiv
 _atom_site_adp_type
 _atom_site_occupancy
 _atom_site_symmetry_multiplicity
 _atom_site_calc_flag
 _atom_site_refinement_flags
 _atom_site_disorder_assembly
 _atom_site_disorder_group
C4 C 0.8181(7) 1.0151(2) 0.5085(4) 0.0686(17) Uani 1 1 d . . .
H4A H 0.7872 0.9896 0.4595 0.103 Uiso 1 1 calc R . .
H4B H 0.9023 1.0314 0.5013 0.103 Uiso 1 1 calc R . .
H4C H 0.7418 1.0391 0.5004 0.103 Uiso 1 1 calc R . .
C5 C 0.9549(6) 0.98220(19) 0.8778(3) 0.0532(13) Uani 1 1 d . . .
H5A H 0.9545 0.9503 0.9083 0.080 Uiso 1 1 calc R . .
H5B H 0.8863 1.0038 0.8934 0.080 Uiso 1 1 calc R . .
H5C H 1.0499 0.9966 0.9018 0.080 Uiso 1 1 calc R . .
C6 C 0.4926(6) 0.8767(2) 0.5277(4) 0.0525(13) Uani 1 1 d . . .
C7 C 0.4287(6) 0.8511(2) 0.5857(4) 0.0600(15) Uani 1 1 d . . .
H7 H 0.3308 0.8435 0.5706 0.072 Uiso 1 1 calc R . .
C8 C 0.5376(5) 0.8385(2) 0.6723(4) 0.0491(12) Uani 1 1 d . . .
C9 C 0.4273(7) 0.8970(3) 0.4251(4) 0.080(2) Uani 1 1 d . . .
H9A H 0.5014 0.9128 0.4041 0.119 Uiso 1 1 calc R . .
H9B H 0.3537 0.9209 0.4250 0.119 Uiso 1 1 calc R . .
H9C H 0.3853 0.8702 0.3810 0.119 Uiso 1 1 calc R . .
C10 C 0.5224(6) 0.8086(2) 0.7563(4) 0.0680(16) Uani 1 1 d . . .
H10A H 0.6149 0.8058 0.8058 0.102 Uiso 1 1 calc R . .
H10B H 0.4872 0.7760 0.7336 0.102 Uiso 1 1 calc R . .
H10C H 0.4553 0.8247 0.7836 0.102 Uiso 1 1 calc R . .
C14 C 0.8577(9) 0.8631(3) 0.3658(4) 0.091(2) Uani 1 1 d . . .
H14A H 0.7920 0.8901 0.3636 0.136 Uiso 1 1 calc R . .
H14B H 0.8078 0.8369 0.3229 0.136 Uiso 1 1 calc R . .
H14C H 0.9370 0.8747 0.3447 0.136 Uiso 1 1 calc R . .
C15 C 1.1047(6) 0.7658(2) 0.6793(4) 0.0604(14) Uani 1 1 d . . .
H15A H 1.0909 0.7722 0.7419 0.091 Uiso 1 1 calc R . .
H15B H 1.2055 0.7692 0.6851 0.091 Uiso 1 1 calc R . .
H15C H 1.0732 0.7326 0.6582 0.091 Uiso 1 1 calc R . .
C16 C 1.3718(6) 0.9709(2) 0.8307(5) 0.0653(17) Uani 1 1 d . . .
C17 C 1.3097(6) 0.9418(2) 0.7471(4) 0.0628(15) Uani 1 1 d . . .
H17 H 1.3328 0.9474 0.6894 0.075 Uiso 1 1 calc R . .
C18 C 1.2127(5) 0.90447(19) 0.7518(3) 0.0465(12) Uani 1 1 d . . .
H18 H 1.1673 0.8859 0.6958 0.056 Uiso 1 1 calc R . .
C19 C 1.1833(5) 0.89478(17) 0.8370(3) 0.0396(10) Uani 1 1 d . . .
C20 C 1.2457(6) 0.9245(2) 0.9193(4) 0.0540(13) Uani 1 1 d . . .
H20 H 1.2247 0.9182 0.9775 0.065 Uiso 1 1 calc R . .
C21 C 1.3374(6) 0.9627(2) 0.9160(5) 0.0671(16) Uani 1 1 d . . .
H21 H 1.3760 0.9828 0.9707 0.080 Uiso 1 1 calc R . .
C22 C 1.1513(5) 0.81923(18) 0.9087(3) 0.0444(11) Uani 1 1 d . . .
C23 C 1.3140(6) 0.8161(2) 0.9548(4) 0.0605(15) Uani 1 1 d . . .
H23A H 1.3375 0.7877 0.9979 0.091 Uiso 1 1 calc R . .
H23B H 1.3486 0.8459 0.9918 0.091 Uiso 1 1 calc R . .
H23C H 1.3590 0.8126 0.9040 0.091 Uiso 1 1 calc R . .
C24 C 1.0662(5) 0.77866(18) 0.9338(4) 0.0490(12) Uani 1 1 d . . .
C25 C 1.1317(7) 0.7427(2) 0.9953(4) 0.0776(19) Uani 1 1 d . . .
H25A H 1.2319 0.7429 1.0228 0.093 Uiso 1 1 calc R . .
H25B H 1.0774 0.7172 1.0107 0.093 Uiso 1 1 calc R . .
C26 C 0.9052(5) 0.77830(18) 0.8915(4) 0.0496(12) Uani 1 1 d . . .
H26 H 0.8688 0.7463 0.9074 0.060 Uiso 1 1 calc R . .
C27 C 0.8387(5) 0.81979(19) 0.9352(4) 0.0460(12) Uani 1 1 d . . .
C28 C 0.8095(5) 0.86384(17) 0.8794(3) 0.0426(11) Uani 1 1 d . . .
C29 C 0.7292(6) 0.9002(2) 0.9086(4) 0.0512(13) Uani 1 1 d . . .
H29 H 0.7024 0.9289 0.8708 0.061 Uiso 1 1 calc R . .
C30 C 0.6881(6) 0.8946(2) 0.9932(4) 0.0647(16) Uani 1 1 d . . .
H30 H 0.6362 0.9197 1.0120 0.078 Uiso 1 1 calc R . .
C31 C 0.7237(7) 0.8520(2) 1.0491(5) 0.0678(17) Uani 1 1 d . . .
H31 H 0.6985 0.8487 1.1065 0.081 Uiso 1 1 calc R . .
C32 C 0.7971(6) 0.8145(2) 1.0190(4) 0.0598(15) Uani 1 1 d . . .
H32 H 0.8189 0.7852 1.0554 0.072 Uiso 1 1 calc R . .
C33 C 1.5030(10) 1.0195(4) 0.7529(6) 0.144(5) Uani 1 1 d . . .
H33A H 1.5734 1.0458 0.7659 0.217 Uiso 1 1 calc R . .
H33B H 1.4168 1.0300 0.7029 0.217 Uiso 1 1 calc R . .
H33C H 1.5417 0.9904 0.7308 0.217 Uiso 1 1 calc R . .
C34 C 0.6724(9) 0.6782(3) 0.7103(6) 0.094(2) Uani 1 1 d . . .
H34A H 0.6046 0.7032 0.6741 0.113 Uiso 1 1 calc R . .
H34B H 0.6655 0.6762 0.7765 0.113 Uiso 1 1 calc R . .
C35 C 0.6397(10) 0.6289(3) 0.6605(6) 0.103(3) Uani 1 1 d . . .
H35A H 0.5436 0.6188 0.6575 0.154 Uiso 1 1 calc R . .
H35B H 0.7081 0.6047 0.6968 0.154 Uiso 1 1 calc R . .
H35C H 0.6464 0.6315 0.5950 0.154 Uiso 1 1 calc R . .
N3 N 0.6354(4) 0.88043(15) 0.5772(3) 0.0444(9) Uani 1 1 d . . .
N4 N 0.6627(4) 0.85645(14) 0.6671(3) 0.0421(9) Uani 1 1 d . . .
N7 N 1.0890(4) 0.85450(12) 0.8465(3) 0.0351(8) Uani 1 1 d . . .
O1 O 0.8640(4) 0.78328(11) 0.7876(2) 0.0458(8) Uani 1 1 d . . .
O2 O 1.4708(6) 1.0085(2) 0.8365(4) 0.1042(18) Uani 1 1 d . . .
O3 O 0.8193(6) 0.6909(2) 0.7129(4) 0.1057(17) Uani 1 1 d . . .
H3 H 0.8414 0.7180 0.7400 0.159 Uiso 1 1 calc R . .
H1 H 0.711(4) 0.9239(16) 0.473(3) 0.037(11) Uiso 1 1 d . . .
C1 C 0.8544(6) 0.99211(19) 0.6096(4) 0.0511(13) Uani 1 1 d . . .
C2 C 0.9033(6) 1.01341(19) 0.6993(4) 0.0550(14) Uani 1 1 d . . .
H2 H 0.9253 1.0469 0.7124 0.066 Uiso 1 1 calc R . .
C3 C 0.9147(5) 0.97579(18) 0.7691(3) 0.0453(11) Uani 1 1 d . . .
C11 C 0.9144(7) 0.8437(2) 0.4690(4) 0.0550(14) Uani 1 1 d . . .
C12 C 1.0087(6) 0.8059(2) 0.5070(4) 0.0552(14) Uani 1 1 d . . .
H12 H 1.0567 0.7864 0.4730 0.066 Uiso 1 1 calc R . .
C13 C 1.0197(5) 0.80192(18) 0.6063(4) 0.0447(11) Uani 1 1 d . . .
B1 B 0.7604(6) 0.9033(2) 0.5461(4) 0.0454(13) Uani 1 1 d . . .
Ir1 Ir 0.874090(18) 0.856929(6) 0.758073(11) 0.03448(8) Uani 1 1 d . . .
N1 N 0.8351(4) 0.94298(14) 0.6225(3) 0.0417(9) Uani 1 1 d . . .
N2 N 0.8760(4) 0.93250(13) 0.7218(3) 0.0380(8) Uani 1 1 d . . .
N5 N 0.8693(5) 0.86230(15) 0.5422(3) 0.0460(10) Uani 1 1 d . . .
N6 N 0.9347(4) 0.83668(15) 0.6273(3) 0.0400(9) Uani 1 1 d . . .
 
loop_
 _atom_site_aniso_label
 _atom_site_aniso_U_11
 _atom_site_aniso_U_22
 _atom_site_aniso_U_33
 _atom_site_aniso_U_23
 _atom_site_aniso_U_13
 _atom_site_aniso_U_12
C4 0.094(5) 0.054(3) 0.055(3) 0.019(3) 0.018(3) 0.008(3)
C5 0.062(4) 0.051(3) 0.043(3) -0.011(2) 0.011(2) 0.002(3)
C6 0.038(3) 0.068(3) 0.046(3) -0.013(2) 0.004(2) 0.009(3)
C7 0.036(3) 0.085(4) 0.059(3) -0.019(3) 0.013(3) -0.003(3)
C8 0.033(3) 0.062(3) 0.052(3) -0.016(2) 0.012(2) -0.007(2)
C9 0.051(4) 0.121(6) 0.055(3) 0.003(3) -0.002(3) 0.011(4)
C10 0.045(3) 0.095(5) 0.070(4) -0.003(3) 0.026(3) -0.021(3)
C14 0.105(6) 0.129(7) 0.047(3) -0.008(4) 0.037(4) 0.004(5)
C15 0.053(3) 0.057(3) 0.077(4) -0.009(3) 0.028(3) 0.008(3)
C16 0.052(3) 0.054(3) 0.075(4) 0.011(3) -0.003(3) -0.023(3)
C17 0.055(3) 0.070(4) 0.059(3) 0.020(3) 0.012(3) -0.012(3)
C18 0.043(3) 0.053(3) 0.040(3) 0.005(2) 0.008(2) -0.015(2)
C19 0.031(2) 0.039(2) 0.046(3) 0.003(2) 0.008(2) -0.0008(19)
C20 0.046(3) 0.063(3) 0.050(3) -0.006(2) 0.010(2) -0.011(3)
C21 0.060(4) 0.059(4) 0.072(4) -0.013(3) 0.005(3) -0.018(3)
C22 0.044(3) 0.045(3) 0.045(3) 0.008(2) 0.015(2) 0.010(2)
C23 0.038(3) 0.066(4) 0.073(4) 0.020(3) 0.011(3) 0.013(3)
C24 0.045(3) 0.047(3) 0.055(3) 0.016(2) 0.015(2) 0.006(2)
C25 0.061(4) 0.068(4) 0.102(5) 0.041(4) 0.023(4) 0.010(3)
C26 0.049(3) 0.041(3) 0.060(3) 0.012(2) 0.019(2) -0.002(2)
C27 0.041(3) 0.049(3) 0.053(3) 0.005(2) 0.021(2) 0.000(2)
C28 0.044(3) 0.043(3) 0.040(2) -0.0006(19) 0.011(2) -0.003(2)
C29 0.047(3) 0.053(3) 0.059(3) 0.009(2) 0.023(3) 0.010(2)
C30 0.062(4) 0.071(4) 0.073(4) -0.002(3) 0.038(3) 0.011(3)
C31 0.071(4) 0.086(5) 0.059(3) 0.006(3) 0.039(3) 0.002(3)
C32 0.064(4) 0.065(4) 0.058(3) 0.014(3) 0.030(3) 0.004(3)
C33 0.125(8) 0.183(10) 0.098(6) 0.068(6) -0.005(5) -0.087(7)
C34 0.097(6) 0.081(5) 0.094(5) -0.009(4) 0.014(4) -0.012(4)
C35 0.117(7) 0.086(5) 0.097(5) 0.007(4) 0.020(5) -0.021(5)
N3 0.038(2) 0.053(2) 0.039(2) -0.0037(18) 0.0067(17) 0.0010(19)
N4 0.036(2) 0.049(2) 0.040(2) -0.0033(18) 0.0097(17) -0.0004(18)
N7 0.034(2) 0.0359(19) 0.0361(19) 0.0012(15) 0.0115(15) -0.0004(16)
O1 0.048(2) 0.0352(17) 0.0536(18) 0.0002(15) 0.0155(15) -0.0055(15)
O2 0.087(4) 0.107(4) 0.099(3) 0.021(3) 0.001(3) -0.060(3)
O3 0.106(4) 0.094(4) 0.125(4) -0.028(3) 0.047(4) -0.030(3)
C1 0.062(3) 0.044(3) 0.045(3) 0.006(2) 0.014(2) 0.004(2)
C2 0.072(4) 0.038(3) 0.055(3) 0.002(2) 0.020(3) -0.001(3)
C3 0.044(3) 0.043(3) 0.045(3) -0.004(2) 0.009(2) -0.001(2)
C11 0.064(4) 0.066(3) 0.043(3) -0.016(2) 0.028(3) -0.016(3)
C12 0.050(3) 0.062(3) 0.061(3) -0.021(3) 0.029(3) -0.010(3)
C13 0.035(3) 0.045(3) 0.057(3) -0.019(2) 0.018(2) -0.008(2)
B1 0.047(3) 0.051(3) 0.033(3) 0.000(2) 0.006(2) -0.001(3)
Ir1 0.03212(11) 0.03648(11) 0.03527(11) -0.00078(7) 0.01102(7) -0.00061(8)
N1 0.046(2) 0.042(2) 0.0343(19) 0.0022(16) 0.0092(17) 0.0003(18)
N2 0.041(2) 0.035(2) 0.0362(18) 0.0011(16) 0.0092(15) 0.0033(17)
N5 0.043(2) 0.056(3) 0.040(2) -0.0081(18) 0.0145(18) -0.0050(19)
N6 0.040(2) 0.046(2) 0.035(2) -0.0063(17) 0.0125(17) -0.0051(18)
 
_geom_special_details
;
 All esds (except the esd in the dihedral angle between two l.s. planes)
 are estimated using the full covariance matrix.  The cell esds are taken
 into account individually in the estimation of esds in distances, angles
 and torsion angles; correlations between esds in cell parameters are only
 used when they are defined by crystal symmetry.  An approximate (isotropic)
 treatment of cell esds is used for estimating esds involving l.s. planes.
;
 
loop_
 _geom_bond_atom_site_label_1
 _geom_bond_atom_site_label_2
 _geom_bond_distance
 _geom_bond_site_symmetry_2
 _geom_bond_publ_flag
C4 C1 1.509(7) . ?
C5 C3 1.490(6) . ?
C6 N3 1.352(6) . ?
C6 C7 1.364(8) . ?
C6 C9 1.508(7) . ?
C7 C8 1.399(7) . ?
C8 N4 1.330(6) . ?
C8 C10 1.487(8) . ?
C14 C11 1.499(8) . ?
C15 C13 1.475(7) . ?
C16 C21 1.376(8) . ?
C16 O2 1.379(7) . ?
C16 C17 1.398(8) . ?
C17 C18 1.392(7) . ?
C18 C19 1.358(6) . ?
C19 C20 1.394(7) . ?
C19 N7 1.450(6) . ?
C20 C21 1.368(7) . ?
C22 N7 1.312(6) . ?
C22 C24 1.476(7) . ?
C22 C23 1.515(7) . ?
C24 C25 1.329(7) . ?
C24 C26 1.492(7) . ?
C26 O1 1.420(6) . ?
C26 C27 1.514(7) . ?
C27 C32 1.384(7) . ?
C27 C28 1.405(7) . ?
C28 C29 1.390(7) . ?
C28 Ir1 2.025(5) . ?
C29 C30 1.393(7) . ?
C30 C31 1.375(8) . ?
C31 C32 1.377(8) . ?
C33 O2 1.356(9) . ?
C34 O3 1.456(9) . ?
C34 C35 1.489(10) . ?
N3 N4 1.388(5) . ?
N3 B1 1.542(7) . ?
N4 Ir1 2.063(4) . ?
N7 Ir1 2.080(4) . ?
O1 Ir1 2.030(4) . ?
C1 C2 1.349(7) . ?
C1 N1 1.352(6) . ?
C2 C3 1.399(7) . ?
C3 N2 1.338(6) . ?
C11 N5 1.348(6) . ?
C11 C12 1.362(8) . ?
C12 C13 1.394(7) . ?
C13 N6 1.339(6) . ?
B1 N1 1.537(6) . ?
B1 N5 1.538(7) . ?
Ir1 N2 2.095(4) . ?
Ir1 N6 2.192(4) . ?
N1 N2 1.380(5) . ?
N5 N6 1.371(5) . ?
 
loop_
 _geom_angle_atom_site_label_1
 _geom_angle_atom_site_label_2
 _geom_angle_atom_site_label_3
 _geom_angle
 _geom_angle_site_symmetry_1
 _geom_angle_site_symmetry_3
 _geom_angle_publ_flag
N3 C6 C7 107.8(5) . . ?
N3 C6 C9 122.5(5) . . ?
C7 C6 C9 129.7(5) . . ?
C6 C7 C8 107.3(5) . . ?
N4 C8 C7 108.6(5) . . ?
N4 C8 C10 124.0(5) . . ?
C7 C8 C10 127.4(5) . . ?
C21 C16 O2 114.8(5) . . ?
C21 C16 C17 120.5(5) . . ?
O2 C16 C17 124.7(6) . . ?
C18 C17 C16 118.8(5) . . ?
C19 C18 C17 120.9(5) . . ?
C18 C19 C20 119.3(4) . . ?
C18 C19 N7 122.6(4) . . ?
C20 C19 N7 118.1(4) . . ?
C21 C20 C19 121.1(5) . . ?
C20 C21 C16 119.3(5) . . ?
N7 C22 C24 121.4(4) . . ?
N7 C22 C23 122.5(4) . . ?
C24 C22 C23 116.1(4) . . ?
C25 C24 C22 120.4(5) . . ?
C25 C24 C26 119.4(5) . . ?
C22 C24 C26 120.1(4) . . ?
O1 C26 C24 110.2(4) . . ?
O1 C26 C27 110.0(4) . . ?
C24 C26 C27 110.8(4) . . ?
C32 C27 C28 121.1(5) . . ?
C32 C27 C26 123.7(5) . . ?
C28 C27 C26 115.0(4) . . ?
C29 C28 C27 117.1(5) . . ?
C29 C28 Ir1 132.1(4) . . ?
C27 C28 Ir1 110.3(3) . . ?
C28 C29 C30 121.3(5) . . ?
C31 C30 C29 120.4(5) . . ?
C30 C31 C32 119.2(5) . . ?
C31 C32 C27 120.7(5) . . ?
O3 C34 C35 106.5(7) . . ?
C6 N3 N4 108.8(4) . . ?
C6 N3 B1 130.6(4) . . ?
N4 N3 B1 120.5(4) . . ?
C8 N4 N3 107.6(4) . . ?
C8 N4 Ir1 135.7(4) . . ?
N3 N4 Ir1 116.7(3) . . ?
C22 N7 C19 115.4(4) . . ?
C22 N7 Ir1 126.9(3) . . ?
C19 N7 Ir1 117.7(3) . . ?
C26 O1 Ir1 107.0(3) . . ?
C33 O2 C16 116.9(6) . . ?
C2 C1 N1 107.9(4) . . ?
C2 C1 C4 130.2(5) . . ?
N1 C1 C4 121.9(4) . . ?
C1 C2 C3 107.4(5) . . ?
N2 C3 C2 108.5(4) . . ?
N2 C3 C5 124.7(4) . . ?
C2 C3 C5 126.7(5) . . ?
N5 C11 C12 107.8(5) . . ?
N5 C11 C14 121.7(6) . . ?
C12 C11 C14 130.4(5) . . ?
C11 C12 C13 107.0(4) . . ?
N6 C13 C12 108.4(5) . . ?
N6 C13 C15 123.3(4) . . ?
C12 C13 C15 128.3(5) . . ?
N1 B1 N5 110.0(4) . . ?
N1 B1 N3 108.2(4) . . ?
N5 B1 N3 109.6(4) . . ?
C28 Ir1 O1 82.18(16) . . ?
C28 Ir1 N4 91.68(19) . . ?
O1 Ir1 N4 91.29(14) . . ?
C28 Ir1 N7 90.01(18) . . ?
O1 Ir1 N7 86.96(13) . . ?
N4 Ir1 N7 177.37(14) . . ?
C28 Ir1 N2 98.71(17) . . ?
O1 Ir1 N2 177.31(13) . . ?
N4 Ir1 N2 86.15(15) . . ?
N7 Ir1 N2 95.57(14) . . ?
C28 Ir1 N6 170.71(16) . . ?
O1 Ir1 N6 88.76(14) . . ?
N4 Ir1 N6 86.44(15) . . ?
N7 Ir1 N6 91.57(15) . . ?
N2 Ir1 N6 90.25(15) . . ?
C1 N1 N2 109.3(4) . . ?
C1 N1 B1 129.3(4) . . ?
N2 N1 B1 120.8(4) . . ?
C3 N2 N1 106.8(4) . . ?
C3 N2 Ir1 137.6(3) . . ?
N1 N2 Ir1 115.5(3) . . ?
C11 N5 N6 109.2(4) . . ?
C11 N5 B1 133.2(4) . . ?
N6 N5 B1 117.6(4) . . ?
C13 N6 N5 107.5(4) . . ?
C13 N6 Ir1 135.2(3) . . ?
N5 N6 Ir1 117.3(3) . . ?
 
_diffrn_measured_fraction_theta_max    0.998
_diffrn_reflns_theta_full              26.02
_diffrn_measured_fraction_theta_full   0.998
_refine_diff_density_max    1.507
_refine_diff_density_min   -0.808
_refine_diff_density_rms    0.121
